# Supplementary material
Source: Springer Nature journal article supplement (https://www.springerprofessional.de/resource/supplementary/13638_2012_556_MOESM13_ESM.pdf/11897948)
Supplement: MOESM13 [file 11897948]

Utilization

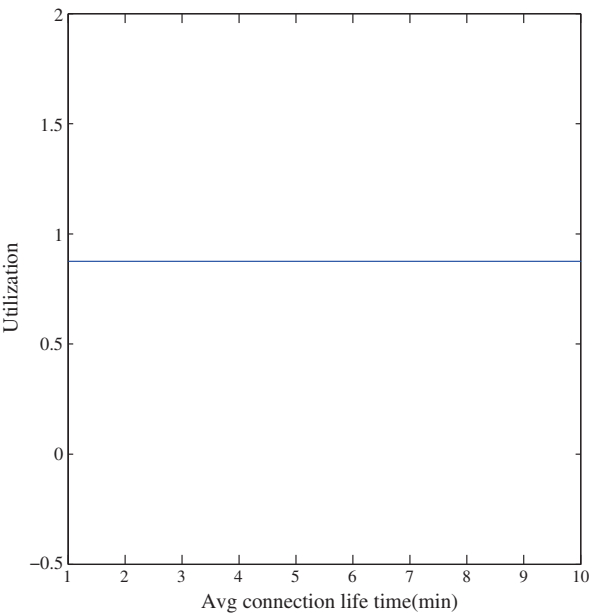

(a)

Average Lifetime Within State

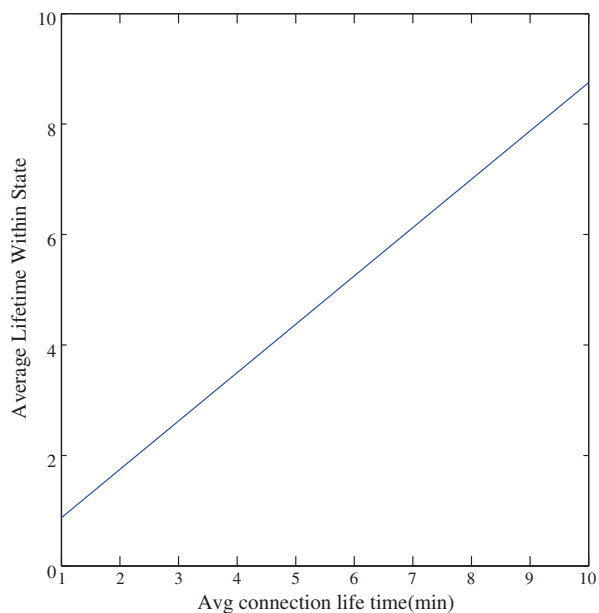

(b)

Mean Handoff Delay per connection

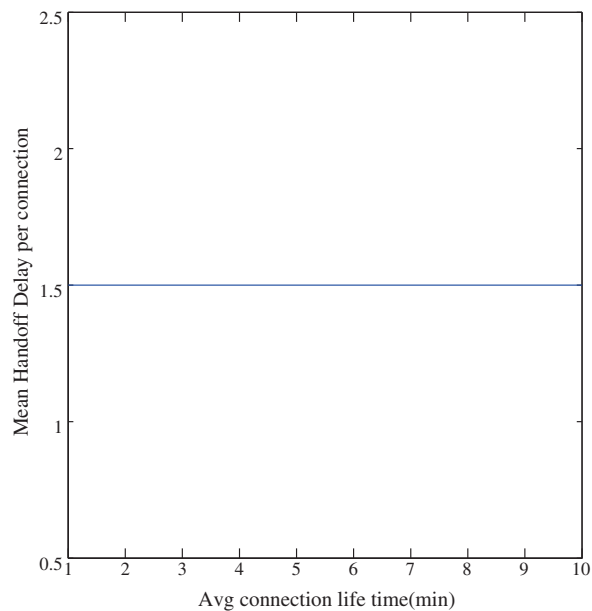

(c)

Mean State Changes

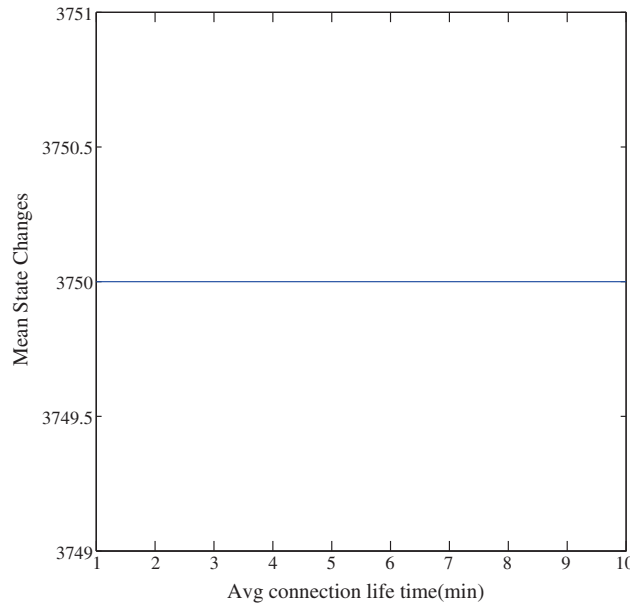

(d)
